# Supplementary material for: Polystyrene nanoplastics as PFAS carriers and their interactions with zwitterionic phospholipid membranes
Source: Royal Society of Chemistry journal article supplement (doi:10.1039/d5na01071c), 2026-01-01
Supplement: d5na01071c1.pdf [file d5na01071c1.pdf]

## Supplementary Information

# Polystyrene Nanoplastics as PFAS Carriers and Their Interactions with Zwitterionic Phospholipid Membranes

*Jiahuiyu Fang<sup>a</sup>, Tongxuan Qiao<sup>b</sup>, Pranab Sarker<sup>a,c</sup>, Xiaoxue Qin<sup>a</sup>, Size Zheng<sup>d</sup>, Mark J. Uline<sup>a,c\*</sup>, Tao Wei<sup>a,c\*</sup>*

<sup>a</sup>. Department of Biomedical Engineering, University of South Carolina, Columbia, SC 29208, United States.

<sup>b</sup>. Syosset High School, Syosset, New York 11791, New York, United States.

<sup>c</sup>. Department of Chemical Engineering, University of South Carolina, Columbia, SC 29208, United States.

<sup>d</sup>. Department of Chemistry, Stony Brook University, Stony Brook, New York 11794, United States.

## Corresponding Author

\* ULINE@cec.sc.edu (M. J. Uline), taow@mailbox.sc.edu (T. Wei)

## Table of Contents

|                                                                                                                                                                                                                                                                                                                                                                                                |   |
|------------------------------------------------------------------------------------------------------------------------------------------------------------------------------------------------------------------------------------------------------------------------------------------------------------------------------------------------------------------------------------------------|---|
| Table S1. Adsorption of PFAS on the 3.1 nm and 6.7 nm NPs in water and on the POPC surface. ....                                                                                                                                                                                                                                                                                               | 1 |
| Figure S1. (a) PFOA, (b) PFOS, and (c) PTFE coated 6.7-nm NP in bulk water. Note: For each system of PFOA and PFOS, there are total 10 refillings (for total 1.0 $\mu$ s). For the system of PTFE, there are total 12 refillings.....                                                                                                                                                          | 1 |
| Figure S2. (a) PFOA, (b) PFOS, and (c) PTFE coated 3.1-nm NP in bulk water after 10 refillings for each system. ....                                                                                                                                                                                                                                                                           | 1 |
| Figure S3. Interactions between the large NP and (a) PFOA, (b) PFOS, and (c) PTFE; and between the small NP and (d) PFOA, (e) PFOS, and (f) PTFE. Here the black/red line stands for the Coulomb/Lennard-Jones interactions, respectively. All the interactions were calculated up to a distance of 1.2 nm, which is the cutoff distance for short-range interactions in the simulations. .... | 2 |
| Figure S4. Minimum distance and interaction energies (LJ and electrostatic) between the POPC membrane and the 6.7-nm NP as a function of simulation time t and representative snapshots in pure water. ....                                                                                                                                                                                    | 2 |
| Figure S5. Minimum distance and interaction energies (LJ and electrostatic) between the POPC membrane and the 3.1-nm NP (a) and PTFE-coated NP (b) as a function of simulation time t and representative snapshots in 0.1 M KCl. ....                                                                                                                                                          | 3 |
| Figure S6. Temporal profiles of interaction energies (LJ and electrostatic) between $-\text{SO}_3^-$ group of PFOS and $-\text{N}^+(\text{CH}_3)_3$ group of POPC lipid membrane. ....                                                                                                                                                                                                         | 3 |
| Figure S7. Minimum distance between the POPC membrane and the PFOS coated NP as a function of simulation time t and representative snapshots in 0.1 M KCl. ....                                                                                                                                                                                                                                | 4 |
| Figure S8. Snapshots of the PFOS-coated NPs adsorbed on the POPC lipid surface (left) and the zoomed-in view of the $-\text{SO}_3^-$ group of the adsorbed PFOS molecules interacting with the $-\text{N}^+(\text{CH}_3)_3$ group of the POPC surface (right) in 0.1 M KCl at t = 210. ....                                                                                                    | 4 |
| Figure S9. Time evolution of number of PFOA molecules detached from NP. Note: two red arrows indicate two times when the PFOA-coated NP contacts the lipid surface.....                                                                                                                                                                                                                        | 5 |
| Figure S10. The final snapshots for PFOA-coated NP system in pure water (a) and 0.1 M KCl (b).....                                                                                                                                                                                                                                                                                             | 5 |
| Figure S11. Temporal profiles of interaction energies (LJ and electrostatic) of PFOA molecules with POPC lipid layers and the NP (bottom).....                                                                                                                                                                                                                                                 | 6 |

Figure S12. Snapshots of the PFOS-coated NPs adsorbed on the POPC lipid surface (left panel) and the zoomed-in view of the adsorbed PFOS molecules and corresponding POPC surface (right panel) in pure water (a) and 0.1 M KCl (b). .....6

**Table S1.** Adsorption of PFAS on the 3.1 nm and 6.7 nm NPs in water and on the POPC surface.

| System     | NP size (nm) | PFAS type | Adsorption amount (g/g) | # of adsorbed molecules | Total molecule # |
|------------|--------------|-----------|-------------------------|-------------------------|------------------|
| Bulk water | 6.7          | PFOA      | 0.78                    | 177                     | 200              |
|            |              | PFOS      | 1.03                    | 193                     | 200              |
|            |              | PTFE      | 1.12                    | 240                     | 240              |
| Bulk water | 3.1          | PFOA      | 1.77                    | 40                      | 40               |
|            |              | PFOS      | 2.13                    | 40                      | 40               |
|            |              | PTFE      | 2.24                    | 48                      | 48               |
| POPC       | 3.1          | PFOA      | 1.28                    | 29                      | 40               |
|            |              | PFOS      | 1.97                    | 37                      | 40               |
|            |              | PTFE      | 2.24                    | 48                      | 48               |

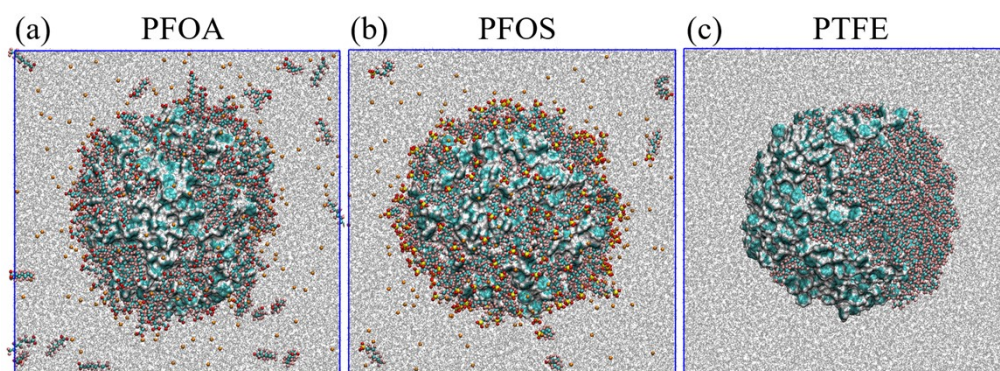

**Figure S1.** (a) PFOA, (b) PFOS, and (c) PTFE coated 6.7-nm NP in bulk water. Note: For each system of PFOA and PFOS, there are total 10 refillings (for total 1.0  $\mu$ s). For the system of PTFE, there are total 12 refillings.

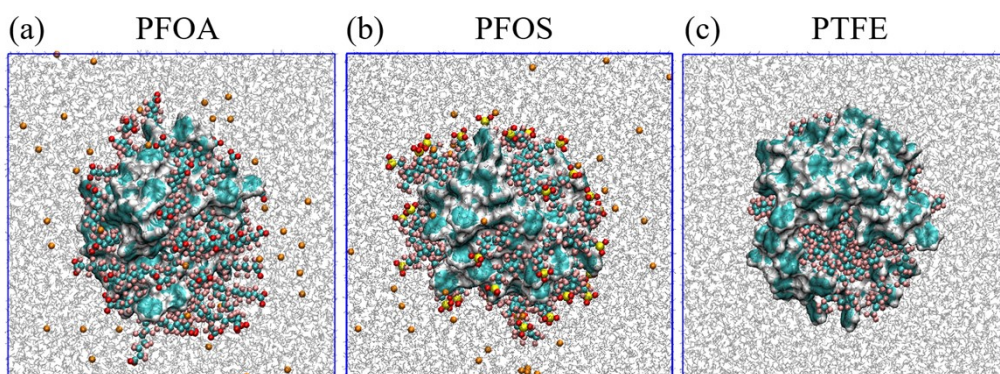

**Figure S2.** (a) PFOA, (b) PFOS, and (c) PTFE coated 3.1-nm NP in bulk water after 10 refillings for each system.

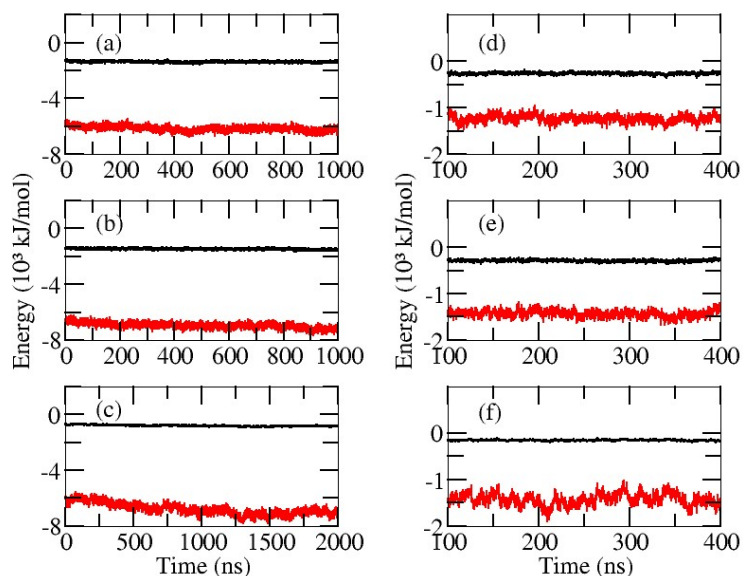

**Figure S3.** Interactions between the large NP and (a) PFOA, (b) PFOS, and (c) PTFE; and between the small NP and (d) PFOA, (e) PFOS, and (f) PTFE. Here the black/red line stands for the Coulomb/Lennard-Jones interactions, respectively. All the interactions were calculated up to a distance of 1.2 nm, which is the cutoff distance for short-range interactions in the simulations.

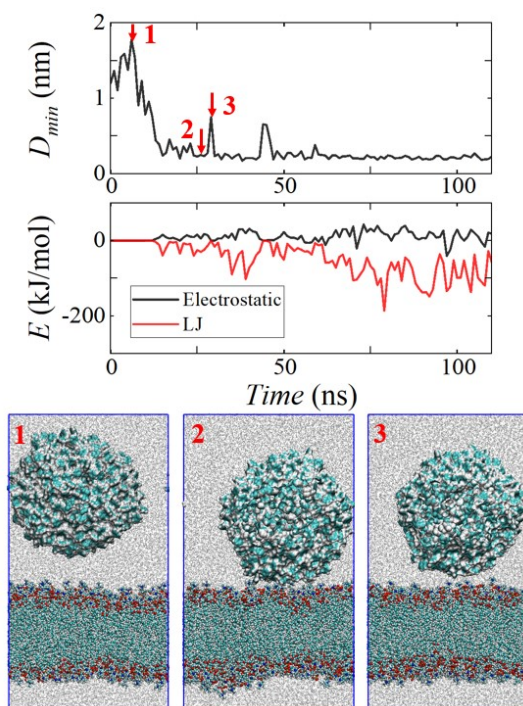

**Figure S4.** Minimum distance and interaction energies (LJ and electrostatic) between the POPC membrane and the 6.7-nm NP as a function of simulation time  $t$  and representative snapshots in pure water.



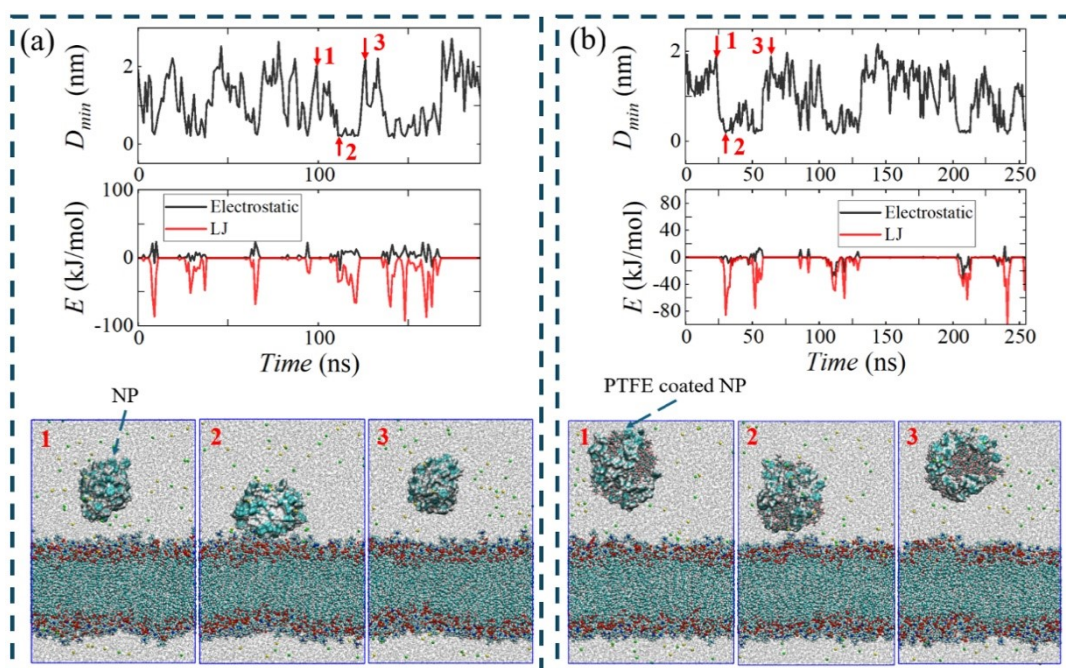

**Figure S5.** Minimum distance and interaction energies (LJ and electrostatic) between the POPC membrane and the 3.1-nm NP (a) and PTFE-coated NP (b) as a function of simulation time  $t$  and representative snapshots in 0.1 M KCl.

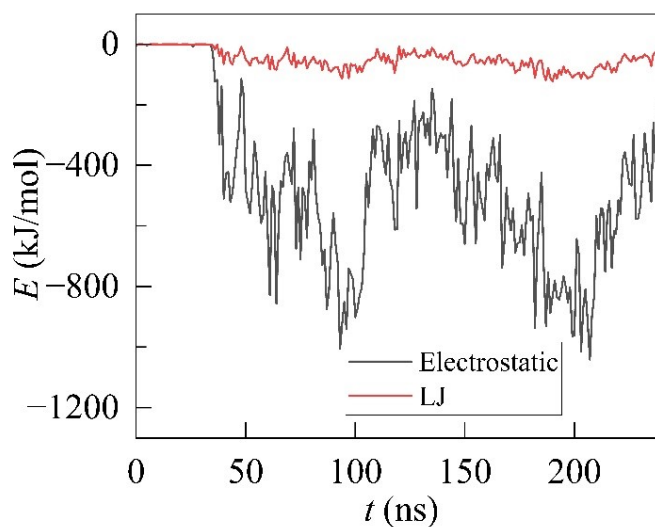

**Figure S6.** Temporal profiles of interaction energies (LJ and electrostatic) between  $-\text{SO}_3^-$  group of PFOS and  $-\text{N}^+(\text{CH}_3)_3$  group of POPC lipid membrane.

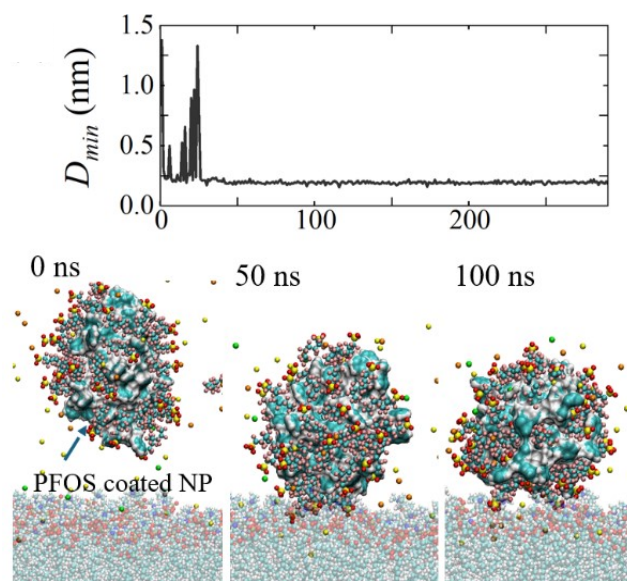

**Figure S7.** Minimum distance between the POPC membrane and the PFOS coated NP as a function of simulation time  $t$  and representative snapshots in 0.1 M KCl.

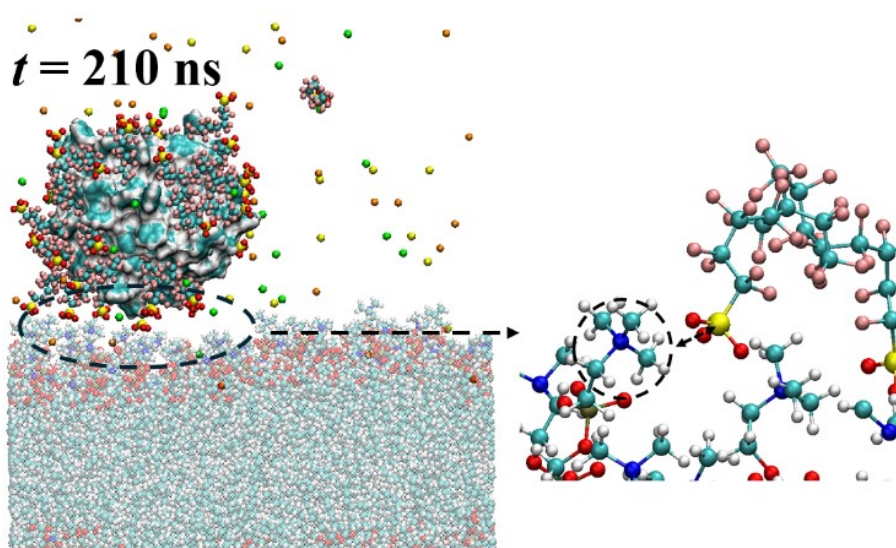

**Figure S8.** Snapshots of the PFOS-coated NPs adsorbed on the POPC lipid surface (left) and the zoomed-in view of the  $-\text{SO}_3^-$  group of the adsorbed PFOS molecules interacting with the  $-\text{N}^+(\text{CH}_3)_3$  group of the POPC surface (right) in 0.1 M KCl at  $t = 210$ .

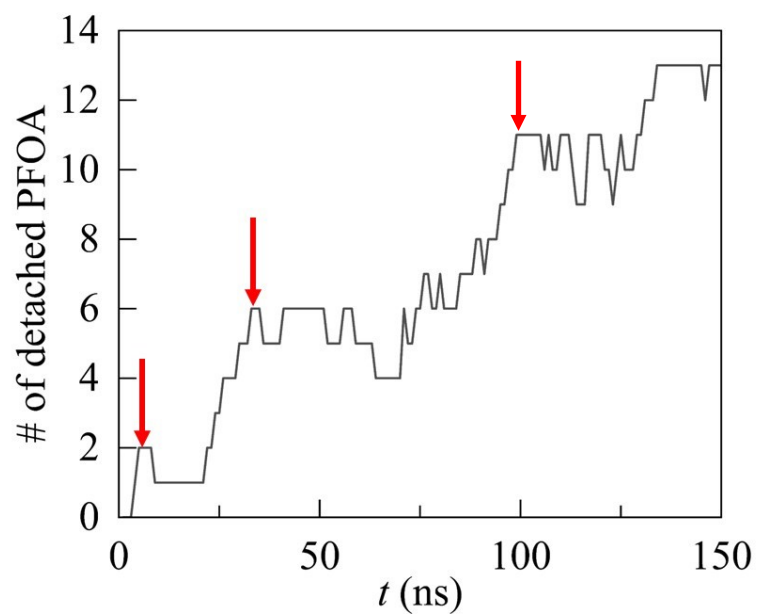

**Figure S9.** Time evolution of the number of PFOA molecules detached from the NP. Note: Red arrows indicate the times at which the PFOA-coated NP contacts the lipid surface.

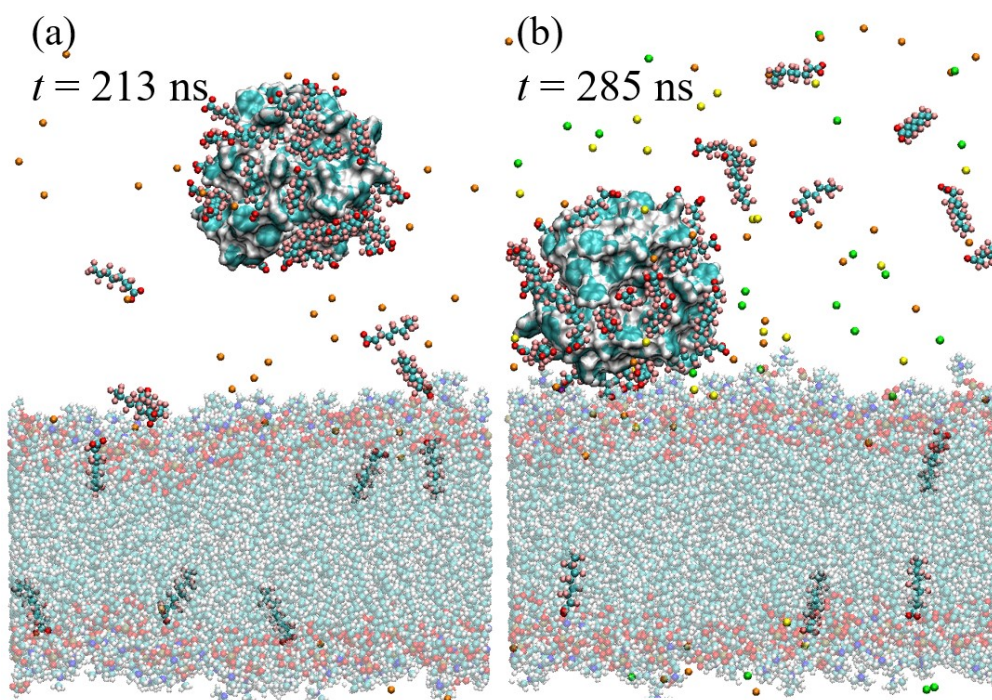

**Figure S10.** The final snapshots for PFOA-coated NP system in pure water (a) and 0.1 M KCl (b).



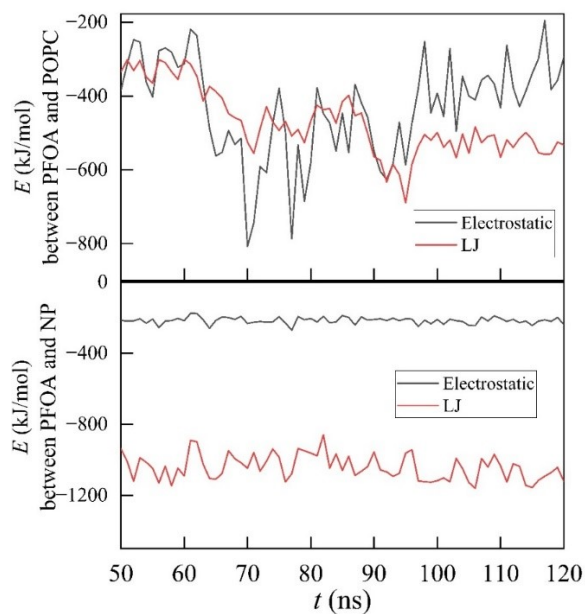

**Figure S11.** Temporal profiles of interaction energies (LJ and electrostatic) of PFOA molecules with POPC lipid layers and the NP (bottom).

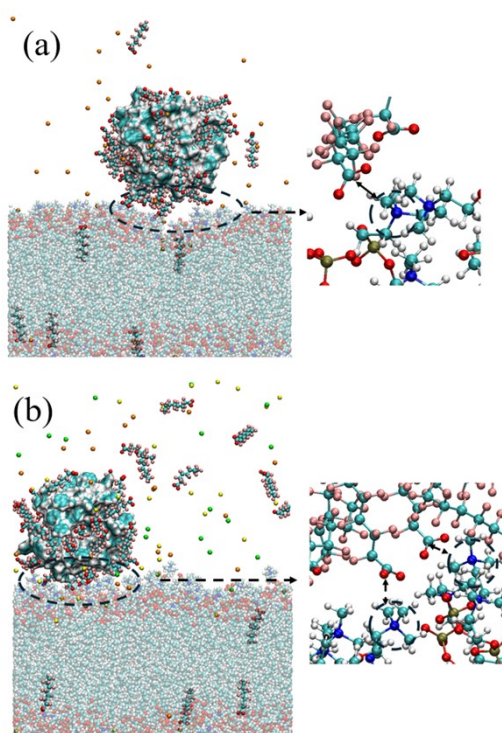

**Figure S12.** Snapshots of the PFOS-coated NPs adsorbed on the POPC lipid surface (left panel) and the zoomed-in view of the adsorbed PFOS molecules and corresponding POPC surface (right panel) in pure water (a) and 0.1 M KCl (b).
